# Supplementary material for: Novel supramolecular luminescent metallogels containing Tb(iii) and Eu(iii) ions with benzene-1,3,5-tricarboxylic acid gelator: advancing semiconductor applications in microelectronic devices
Source: Royal Society of Chemistry journal article supplement (doi:10.1039/d3ra07903a), 2024-01-01
Supplement: d3ra07903a1.pdf [file d3ra07903a1.pdf]

## Electronic Supplementary Information†

### Novel Supramolecular Luminescent Metallogels Containing Tb(III) and Eu(III) Ions with Benzene-1,3,5-tricarboxylic Acid Gelator: Advancing Semiconductor Applications in Microelectronic Devices†

Subhendu Dhibar,<sup>\*a,‡</sup> Aiswarya Mohan,<sup>b,‡</sup> Kripasindhu Karmakar,<sup>a,‡</sup> Bijneswar Mondal,<sup>c</sup> Arpita Roy,<sup>c</sup> Saranya Babu,<sup>b</sup> Parul Garg,<sup>d</sup> Pradip Ruidas,<sup>e</sup> Subham Bhattacharjee,<sup>e</sup> Sanjay Roy,<sup>f</sup> Ashok Bera,<sup>d</sup> Soumya Jyoti Ray,<sup>c</sup> Padmanabhan Predeep,<sup>\*b</sup> and Bidyut Saha<sup>\*a</sup>

<sup>a</sup>Colloid Chemistry Laboratory, Department of Chemistry, The University of Burdwan, Golapbag, Burdwan-713104, West Bengal, India \*E-mail: sdhibar@scholar.buruniv.ac.in, Tel: +91 7001575909 (S. Dhibar); \*E-mail: bsaha@chem.buruniv.ac.in, Tel: +91 9476341691 (B. Saha).

<sup>b</sup>Laboratory for Molecular Photonics and Electronics (LAMP), Department of Physics, National Institute of Technology Calicut, Calicut-673603, Kerala, India; \*E-mail: predeep@nitc.ac.in (P. Predeep).

<sup>c</sup>Department of Chemistry, Guru Ghasidas Vishwavidyalaya, Bilaspur-495009, Chhattisgarh, India.

<sup>d</sup>Department of Physics, Indian Institute of Technology Patna, Bihar-801106, India.

<sup>e</sup>Department of Physics, Indian Institute of Technology Jammu, J&K-181221, India.

<sup>f</sup>Department of Chemistry, Kazi Nazrul University, Asansol-713303, West Bengal, India.

<sup>g</sup>Department of Chemistry, School of Science, Netaji Subhas Open University, Kalyani Regional Centre, Kolkata-741251, India.

‡SD, AM and KK should be treated as joint first authors.

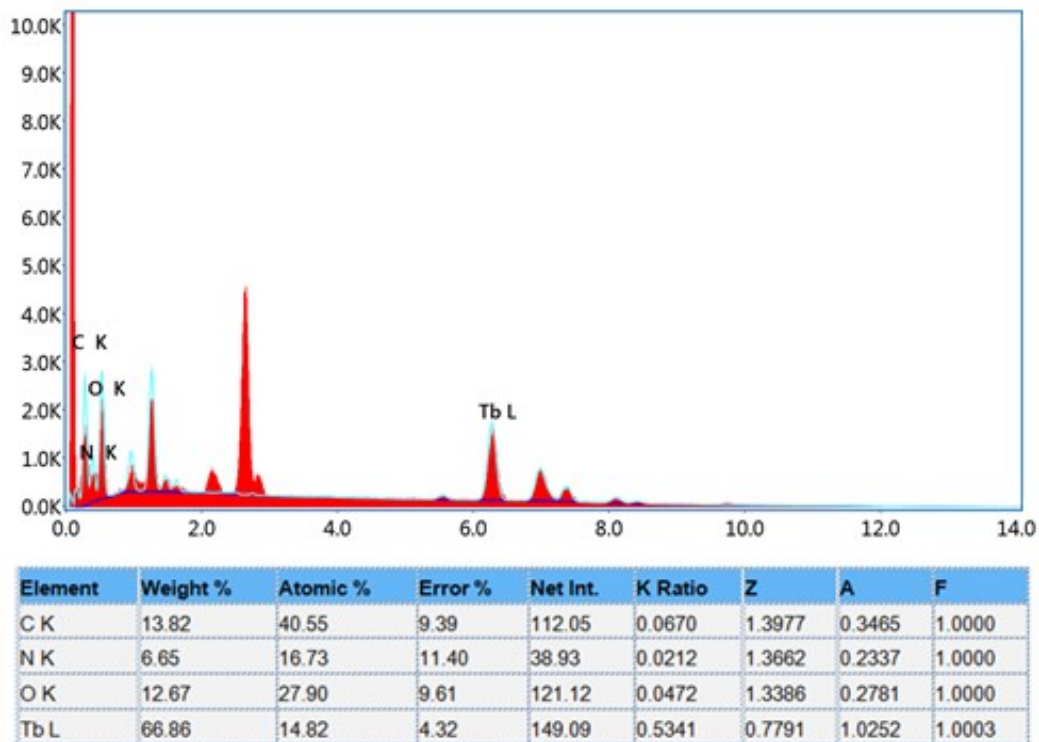

Fig. S1. EDX spectra of EuTb-TA metallogel.

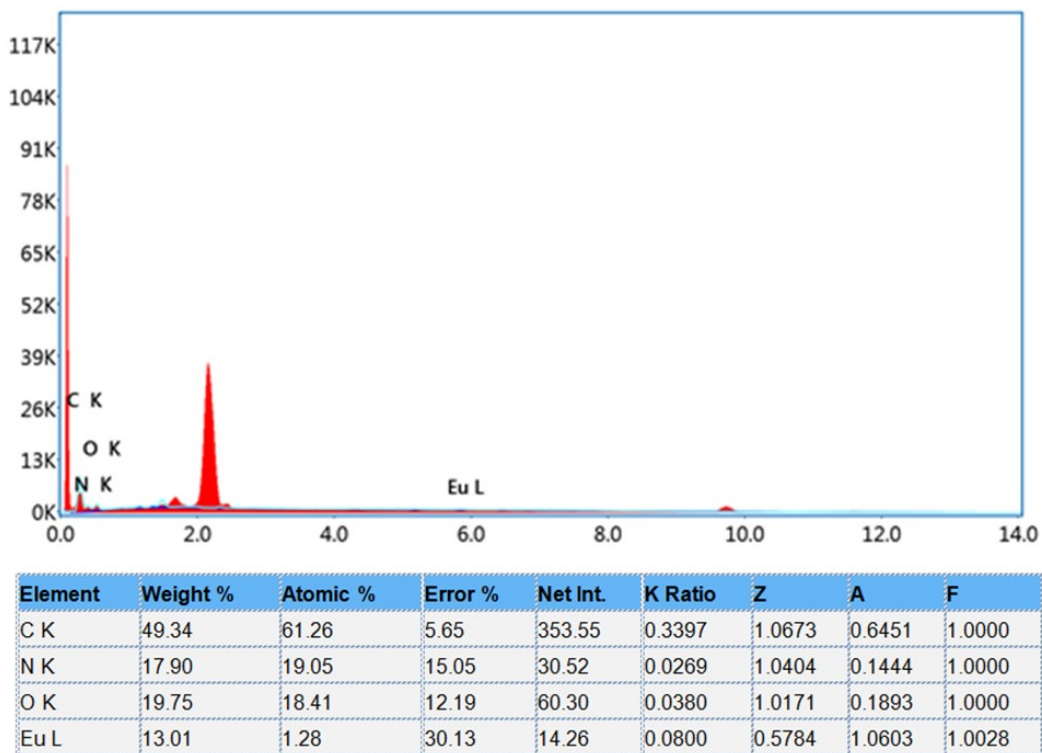

Fig. S2. EDX spectra of Eu-TA metallogel.

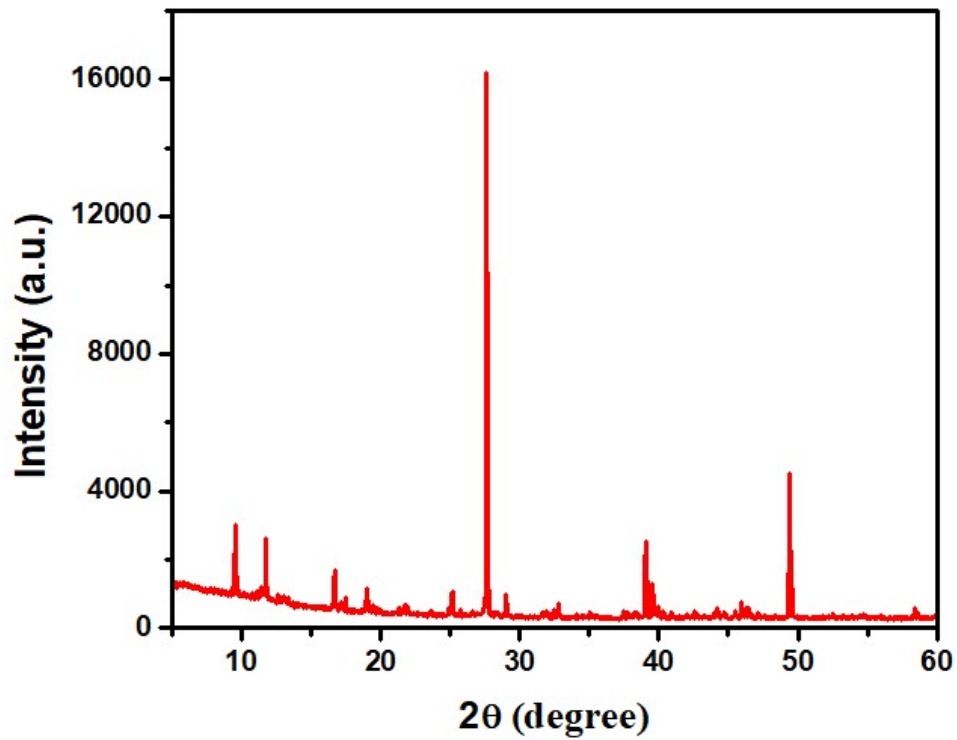

Fig. S3. The PXRd pattern of  $\text{Tb}(\text{OAc})_3 \cdot \text{H}_2\text{O}$ .

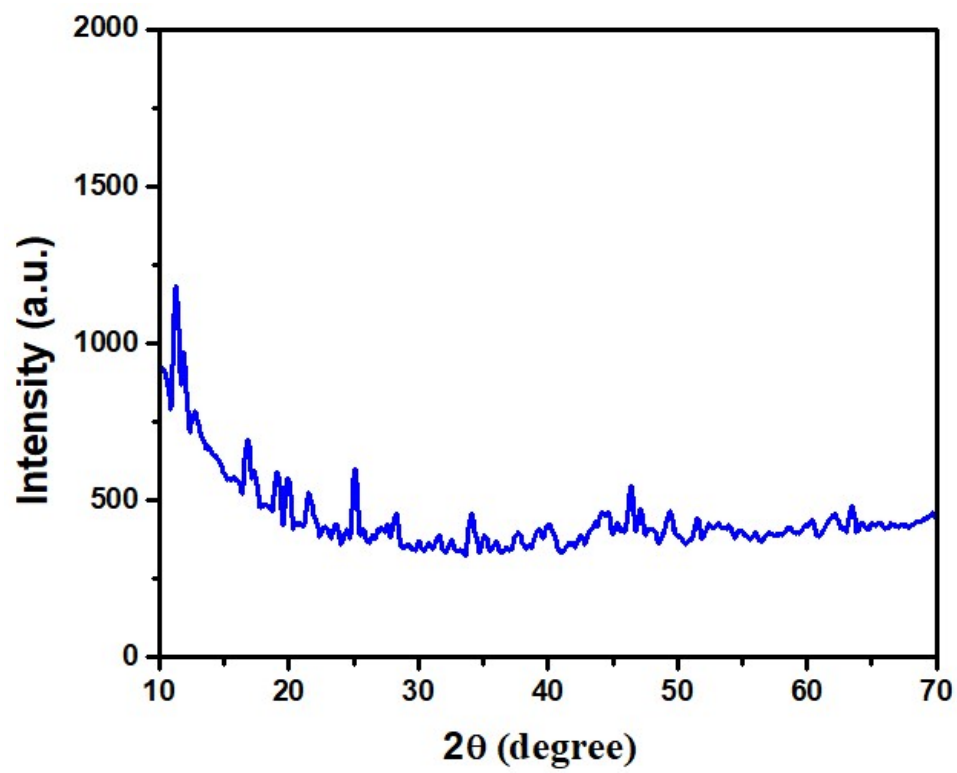

Fig. S4. The PXRd pattern of  $\text{Eu}(\text{OAc})_3 \cdot \text{H}_2\text{O}$ .

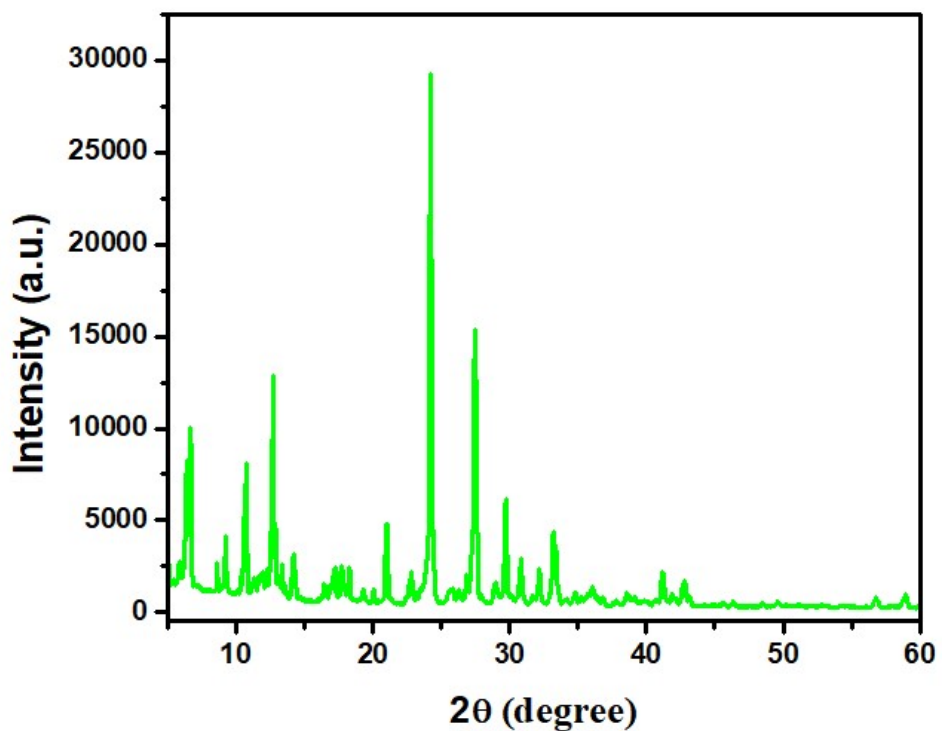

Fig. S5. The PXRD pattern of benzene-1,3,5-tricarboxylic acid.

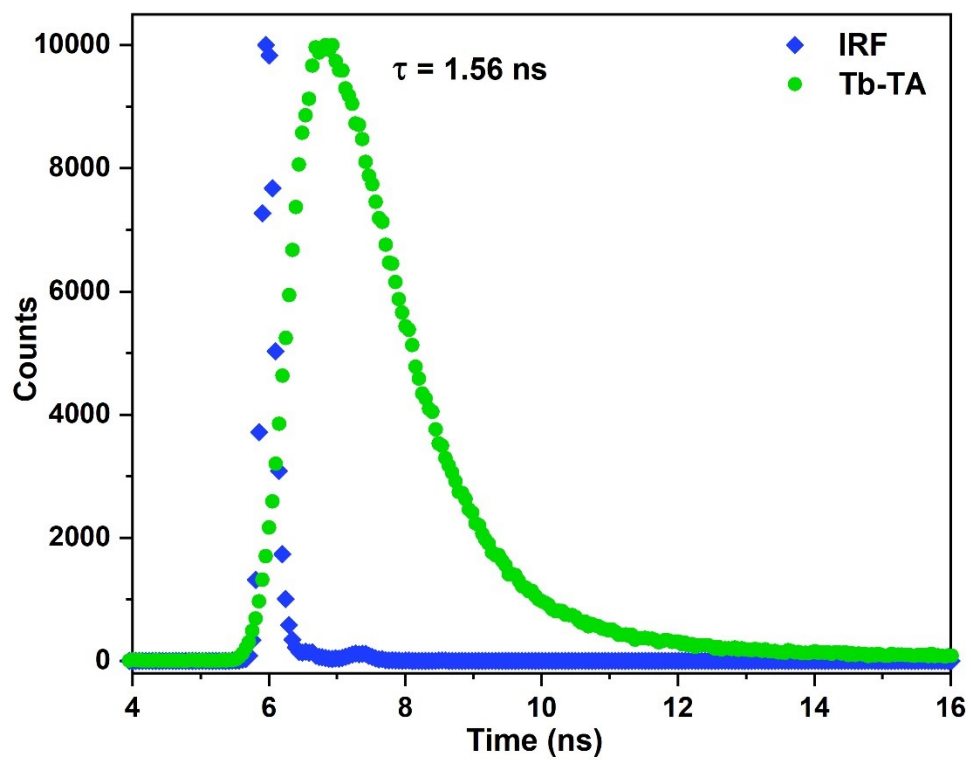

Fig. S6. Lifetime decay profile of Tb-TA metallogel where excitation ( $\lambda$ ) was 340 nm and emission ( $\lambda$ ) was 480 nm. IRF= instrument response function.

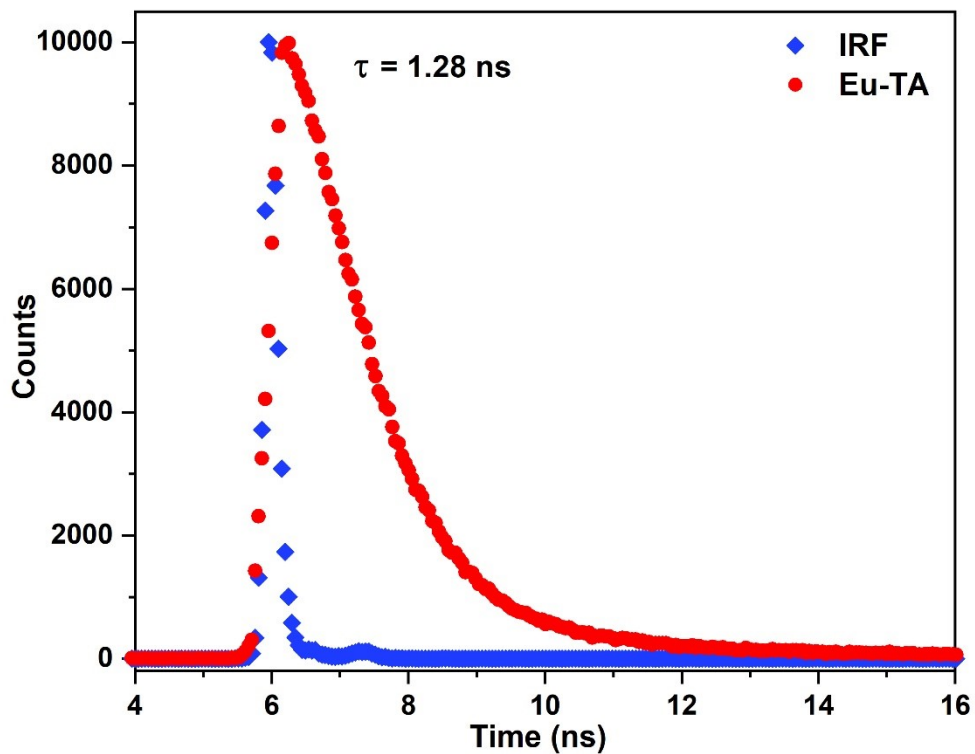

**Fig. S7.** Lifetime decay profile of **Eu-TA** metallogel where excitation ( $\lambda$ ) was 340 nm and emission ( $\lambda$ ) was 480 nm. IRF= instrument response function.

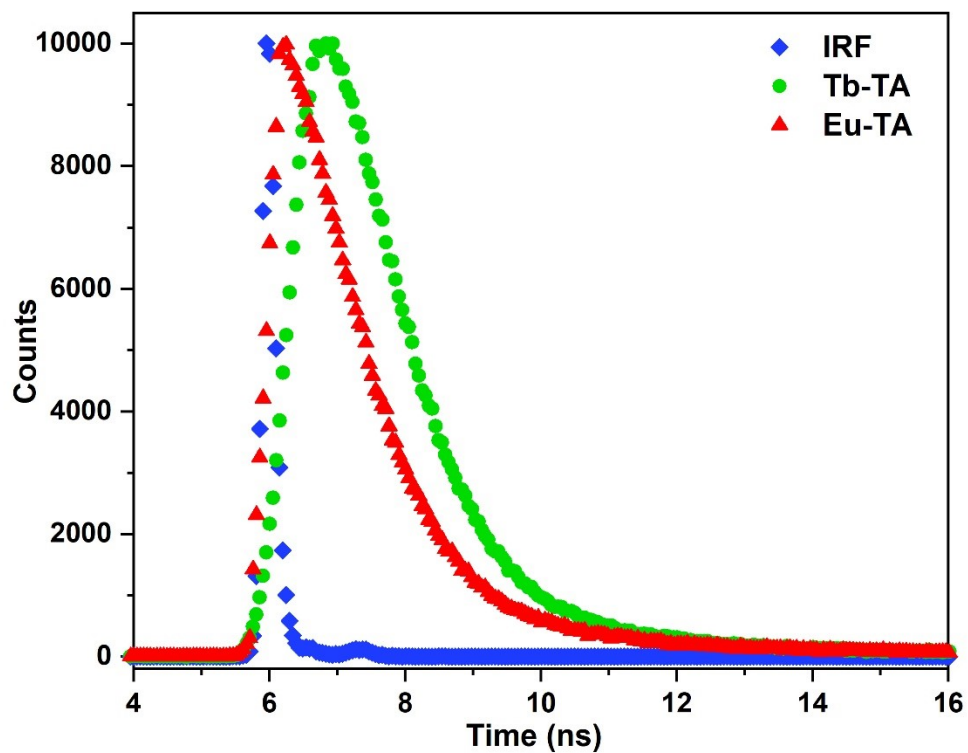

**Fig. S8.** Comparison of lifetime decay profile of **Tb-TA** and **Eu-TA** metallogels.
